# Supplementary material
Source: Copernicus journal article supplement (doi:10.5194/hess-30-2543-2026)
Supplement: Supplementary file 1 [file hess-30-2543-2026-supplement.pdf]

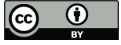

*Supplement of*

## **Leveraging 20 years of remote sensing to characterize surface phytoplankton seasonality and long-term trends in lake Tanganyika**

**François Toussaint et al.**

*Correspondence to:* François Toussaint ([francois.toussaint@uclouvain.com](mailto:francois.toussaint@uclouvain.com))

The copyright of individual parts of the supplement might differ from the article licence.

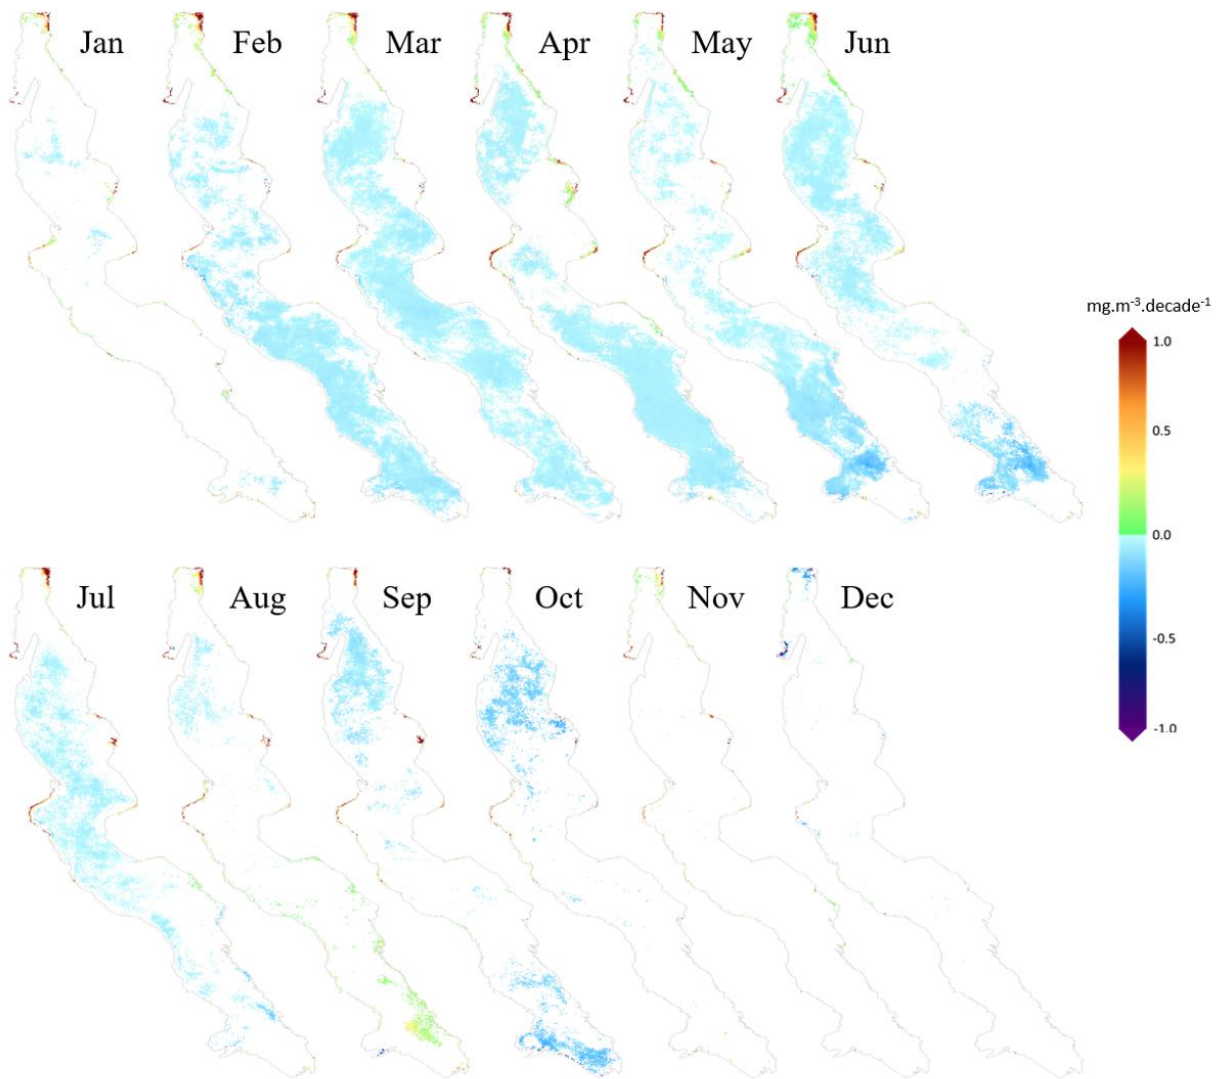

Figure S1: Maps of monthly trends in chlorophyll-a concentrations in Lake Tanganyika (2002–2022), expressed as Sen's slope estimator. Statistical significance was assessed using the Mann–Kendall test; only trends with  $p$ -values  $< 0.05$  are shown, while non-significant trends ( $p \geq 0.05$ ) are omitted.
